# Supplementary material
Source: Research Square preprint supplement (doi:10.21203/rs.3.rs-9212823/v1)
Supplement: Supplementary file 1 [file 1331f69f3ef7b884811b8249.xlsx]

## Sheet: Sheet1
# Time (years)	0.57 wt% Earth (baseline) melt volume (m^3)	0.57 wt% Earth (initial magma ocean state) melt volume (m^3)	0.57 wt% Earth (baseline) percent of lithosphere molten	0.57 wt% Earth (initial magma ocean state) percent of lithosphere molten
0	1.6419e+18	1.2879e+19	10.63	97.0692
1000000	3.416e+18	1.2044e+19	24.2769	90.6462
2000000	4.6233e+18	1.1781e+19	33.5638	88.6231
3000000	5.5232e+18	1.1599e+19	40.4862	87.2231
3.99987e+06	6.3064e+18	1.148e+19	46.5108	86.3077
5000000	6.9792e+18	1.1389e+19	51.6862	85.6077
6.00013e+06	7.1979e+18	1.1237e+19	53.3685	84.4385
6.99994e+06	7.5381e+18	1.1171e+19	55.9854	83.9308
8.00006e+06	7.8846e+18	1.1137e+19	58.6508	83.6692
8.99987e+06	8.0814e+18	1.1066e+19	60.1646	83.1231
10000000	8.3041e+18	1.1033e+19	61.8777	82.8692
1.10001e+07	8.3973e+18	1.0964e+19	62.5946	82.3385
1.19999e+07	8.4199e+18	1.088e+19	62.7685	81.6923
1.30001e+07	8.5077e+18	1.0843e+19	63.4438	81.4077
1.39999e+07	8.6257e+18	1.0817e+19	64.3515	81.2077
15000000	8.7385e+18	1.0803e+19	65.2192	81.1
1.60001e+07	8.7734e+18	1.0753e+19	65.4877	80.7154
1.69999e+07	8.8339e+18	1.072e+19	65.9531	80.4615
1.80001e+07	9.0489e+18	1.0778e+19	67.6069	80.9077
1.89999e+07	9.1451e+18	1.0763e+19	68.3469	80.7923
20000000	9.2145e+18	1.0745e+19	68.8808	80.6538
2.10001e+07	9.2248e+18	1.0698e+19	68.96	80.2923
2.19999e+07	9.3535e+18	1.0733e+19	69.95	80.5615
2.30001e+07	9.3261e+18	1.0666e+19	69.7392	80.0462
2.39999e+07	9.4755e+18	1.0724e+19	70.8885	80.4923
25000000	9.4284e+18	1.0648e+19	70.5262	79.9077
2.60001e+07	9.3974e+18	1.0601e+19	70.2877	79.5462
2.69999e+07	9.4772e+18	1.0628e+19	70.9015	79.7538
2.80001e+07	9.5527e+18	1.0647e+19	71.4823	79.9
2.89999e+07	9.4908e+18	1.0575e+19	71.0062	79.3462
30000000	9.5051e+18	1.0561e+19	71.1162	79.2385
3.10001e+07	9.5094e+18	1.0542e+19	71.1492	79.0923
3.20015e+07	9.4365e+18	1.047e+19	70.5885	78.5385
3.30004e+07	9.4447e+18	1.0459e+19	70.6515	78.4538
3.39992e+07	9.425e+18	1.0423e+19	70.5	78.1769
3.50013e+07	9.5495e+18	1.0492e+19	71.4577	78.7077
3.60001e+07	9.5514e+18	1.0464e+19	71.4723	78.4923
3.6999e+07	9.5433e+18	1.0439e+19	71.41	78.3
3.8001e+07	9.5805e+18	1.0446e+19	71.6962	78.3538
3.89999e+07	9.6356e+18	1.0467e+19	72.12	78.5154
3.99987e+07	9.6444e+18	1.0453e+19	72.1877	78.4077
4.10008e+07	9.6223e+18	1.0418e+19	72.0177	78.1385
4.19996e+07	9.5577e+18	1.0354e+19	71.5208	77.6462
4.29985e+07	9.5871e+18	1.0365e+19	71.7469	77.7308
4.40005e+07	9.5733e+18	1.0339e+19	71.6408	77.5308
4.49994e+07	9.5402e+18	1.0303e+19	71.3862	77.2538
4.60014e+07	9.5209e+18	1.0275e+19	71.2377	77.0385
4.70003e+07	9.513e+18	1.0259e+19	71.1769	76.9154
4.79991e+07	9.5338e+18	1.0264e+19	71.3369	76.9538
4.90011e+07	9.5225e+18	1.0242e+19	71.25	76.7846
50000000	9.5653e+18	1.0266e+19	71.5792	76.9692
5.09989e+07	9.5654e+18	1.0253e+19	71.58	76.8692
5.20009e+07	9.5125e+18	1.0196e+19	71.1731	76.4308
5.29997e+07	9.4928e+18	1.0169e+19	71.0215	76.2231
5.39986e+07	9.4813e+18	1.0151e+19	70.9331	76.0846
5.50006e+07	9.456e+18	1.0121e+19	70.7385	75.8538
5.59995e+07	9.4606e+18	1.0114e+19	70.7738	75.8
5.70015e+07	9.4741e+18	1.0116e+19	70.8777	75.8154
5.80004e+07	9.4734e+18	1.0105e+19	70.8723	75.7308
5.89992e+07	9.4126e+18	1.0045e+19	70.4046	75.2692
6.00013e+07	9.3896e+18	1.002e+19	70.2277	75.0769
6.10001e+07	9.4201e+18	1.0034e+19	70.4623	75.1846
6.1999e+07	9.4135e+18	1.0018e+19	70.4115	75.0615
6.3001e+07	9.3426e+18	9.9504e+18	69.8662	74.5415
6.39999e+07	9.3431e+18	9.945e+18	69.87	74.5
6.49987e+07	9.3004e+18	9.9018e+18	69.5415	74.1677
6.60008e+07	9.2868e+18	9.8833e+18	69.4369	74.0254
6.69996e+07	9.3102e+18	9.8961e+18	69.6169	74.1238
6.79985e+07	9.2868e+18	9.8672e+18	69.4369	73.9015
6.90005e+07	9.2791e+18	9.8536e+18	69.3777	73.7969
6.99994e+07	9.2694e+18	9.8373e+18	69.3031	73.6715
7.10014e+07	9.241e+18	9.806e+18	69.0846	73.4308
7.20003e+07	9.2471e+18	9.8035e+18	69.1315	73.4115
7.29991e+07	9.2616e+18	9.8087e+18	69.2431	73.4515
7.40011e+07	9.1886e+18	9.7381e+18	68.6815	72.9085
75000000	9.1326e+18	9.6857e+18	68.2508	72.5054
7.59989e+07	9.1366e+18	9.6845e+18	68.2815	72.4962
7.70009e+07	9.1446e+18	9.6842e+18	68.3431	72.4938
7.79997e+07	9.1678e+18	9.6952e+18	68.5215	72.5785
7.89986e+07	9.117e+18	9.6434e+18	68.1308	72.18
8.00006e+07	9.2049e+18	9.7124e+18	68.8069	72.7108
8.09995e+07	9.1412e+18	9.6465e+18	68.3169	72.2038
8.20015e+07	9.0884e+18	9.5947e+18	67.9108	71.8054
8.30004e+07	9.0668e+18	9.571e+18	67.7446	71.6231
8.39992e+07	9.0353e+18	9.5382e+18	67.5023	71.3708
8.50013e+07	9.0274e+18	9.5252e+18	67.4415	71.2708
8.60001e+07	8.999e+18	9.4943e+18	67.2231	71.0331
8.6999e+07	8.9827e+18	9.475e+18	67.0977	70.8846
8.8001e+07	8.9241e+18	9.4182e+18	66.6469	70.4477
8.89999e+07	8.8816e+18	9.3763e+18	66.32	70.1254
8.99987e+07	8.8789e+18	9.3693e+18	66.2992	70.0715
9.10008e+07	8.9307e+18	9.4075e+18	66.6977	70.3654
9.19996e+07	8.9288e+18	9.397e+18	66.6831	70.2846
9.29985e+07	8.9268e+18	9.3883e+18	66.6677	70.2177
9.40005e+07	8.8863e+18	9.3452e+18	66.3562	69.8862
9.49994e+07	8.8298e+18	9.2904e+18	65.9215	69.4646
9.60014e+07	8.8114e+18	9.2694e+18	65.78	69.3031
9.70003e+07	8.8249e+18	9.2759e+18	65.8838	69.3531
9.79991e+07	8.754e+18	9.2065e+18	65.3385	68.8192
9.90011e+07	8.7698e+18	9.2163e+18	65.46	68.8946
100000000	8.7009e+18	9.1483e+18	64.93	68.3715
1.00999e+08	8.6913e+18	9.1343e+18	64.8562	68.2638
1.02001e+08	8.6601e+18	9.102e+18	64.6162	68.0154
1.03e+08	8.5833e+18	9.0283e+18	64.0254	67.4485
1.03999e+08	8.6898e+18	9.1193e+18	64.8446	68.1485
1.05001e+08	8.5976e+18	9.028e+18	64.1354	67.4462
1.05999e+08	8.5604e+18	8.9908e+18	63.8492	67.16
1.07002e+08	8.5795e+18	9.003e+18	63.9962	67.2538
1.08e+08	8.5695e+18	8.9878e+18	63.9192	67.1369
1.08999e+08	8.5217e+18	8.9393e+18	63.5515	66.7638
1.10001e+08	8.466e+18	8.8841e+18	63.1231	66.3392
1.11e+08	8.4663e+18	8.8811e+18	63.1254	66.3162
1.11999e+08	8.4123e+18	8.8268e+18	62.71	65.8985
1.13001e+08	8.357e+18	8.7724e+18	62.2846	65.48
1.14e+08	8.3417e+18	8.7546e+18	62.1669	65.3431
1.14999e+08	8.3294e+18	8.7389e+18	62.0723	65.2223
1.16001e+08	8.3089e+18	8.7146e+18	61.9146	65.0354
1.17e+08	8.2559e+18	8.661e+18	61.5069	64.6231
1.17998e+08	8.2611e+18	8.6614e+18	61.5469	64.6262
1.19001e+08	8.2194e+18	8.6185e+18	61.2262	64.2962
1.19999e+08	8.1972e+18	8.594e+18	61.0554	64.1077
1.21001e+08	8.1194e+18	8.5182e+18	60.4569	63.5246
1.22e+08	8.1346e+18	8.5282e+18	60.5738	63.6015
1.22999e+08	8.1167e+18	8.5063e+18	60.4362	63.4331
1.24001e+08	8.1e+18	8.4861e+18	60.3077	63.2777
125000000	8.1462e+18	8.5234e+18	60.6631	63.5646
1.25999e+08	8.1063e+18	8.4807e+18	60.3562	63.2362
1.27001e+08	8.048e+18	8.4227e+18	59.9077	62.79
1.28e+08	7.9913e+18	8.3665e+18	59.4715	62.3577
1.28999e+08	7.9457e+18	8.3206e+18	59.1208	62.0046
1.30001e+08	7.9278e+18	8.3e+18	58.9831	61.8462
1.30999e+08	7.8992e+18	8.2693e+18	58.7631	61.61
1.32002e+08	7.9301e+18	8.2937e+18	59.0008	61.7977
1.33e+08	7.8415e+18	8.2064e+18	58.3192	61.1262
1.33999e+08	7.8171e+18	8.1804e+18	58.1315	60.9262
1.35001e+08	7.7637e+18	8.1265e+18	57.7208	60.5115
1.36e+08	7.7102e+18	8.0725e+18	57.3092	60.0962
1.36999e+08	7.714e+18	8.0727e+18	57.3385	60.0977
1.38001e+08	7.6272e+18	7.9874e+18	56.6708	59.4415
1.39e+08	7.6185e+18	7.9757e+18	56.6038	59.3515
1.39999e+08	7.584e+18	7.9391e+18	56.3385	59.07
1.41001e+08	7.519e+18	7.874e+18	55.8385	58.5692
1.42e+08	7.4832e+18	7.8376e+18	55.5631	58.2892
1.42998e+08	7.4758e+18	7.827e+18	55.5062	58.2077
1.44001e+08	7.4417e+18	7.7905e+18	55.2438	57.9269
1.44999e+08	7.4138e+18	7.7609e+18	55.0292	57.6992
1.46001e+08	7.3447e+18	7.6918e+18	54.4977	57.1677
1.47e+08	7.3211e+18	7.6659e+18	54.3162	56.9685
1.47999e+08	7.2769e+18	7.6203e+18	53.9762	56.6177
1.49001e+08	7.2892e+18	7.6277e+18	54.0708	56.6746
150000000	7.247e+18	7.5835e+18	53.7462	56.3346
1.50999e+08	7.2573e+18	7.5887e+18	53.8254	56.3746
1.52001e+08	7.25e+18	7.5775e+18	53.7692	56.2885
1.53e+08	7.1794e+18	7.5064e+18	53.2262	55.7415
1.53999e+08	7.1348e+18	7.4607e+18	52.8831	55.39
1.55001e+08	7.1676e+18	7.4871e+18	53.1354	55.5931
1.55999e+08	7.1623e+18	7.4777e+18	53.0946	55.5208
1.57002e+08	7.0794e+18	7.3949e+18	52.4569	54.8838
1.58e+08	7.0213e+18	7.3368e+18	52.01	54.4369
1.58999e+08	7.1031e+18	7.4104e+18	52.6392	55.0031
1.60001e+08	7.0012e+18	7.3088e+18	51.8554	54.2215
1.61e+08	6.9877e+18	7.2928e+18	51.7515	54.0985
1.61999e+08	6.9475e+18	7.2506e+18	51.4423	53.7738
1.63001e+08	6.8962e+18	7.1984e+18	51.0477	53.3723
1.64e+08	6.8427e+18	7.144e+18	50.6362	52.9538
1.64999e+08	6.8154e+18	7.1147e+18	50.4262	52.7285
1.66001e+08	6.7865e+18	7.0835e+18	50.2038	52.4885
1.67e+08	6.7443e+18	7.04e+18	49.8792	52.1538
1.67998e+08	6.6999e+18	6.9937e+18	49.5377	51.7977
1.69001e+08	6.6332e+18	6.9267e+18	49.0246	51.2823
1.69999e+08	6.5874e+18	6.8798e+18	48.6723	50.9215
1.71001e+08	6.5422e+18	6.8334e+18	48.3246	50.5646
1.72e+08	6.484e+18	6.7745e+18	47.8769	50.1115
1.72999e+08	6.5422e+18	6.8271e+18	48.3246	50.5162
1.74001e+08	6.4774e+18	6.761e+18	47.8262	50.0077
175000000	6.4233e+18	6.7059e+18	47.41	49.5838
1.75999e+08	6.3962e+18	6.6766e+18	47.2015	49.3585
1.77001e+08	6.3445e+18	6.6234e+18	46.8038	48.9492
1.78e+08	6.3101e+18	6.5875e+18	46.5392	48.6731
1.78999e+08	6.2908e+18	6.5655e+18	46.3908	48.5038
1.80001e+08	6.2068e+18	6.4812e+18	45.7446	47.8554
1.80999e+08	6.2024e+18	6.474e+18	45.7108	47.8
1.82002e+08	6.1428e+18	6.4132e+18	45.2523	47.3323
1.83e+08	6.087e+18	6.3563e+18	44.8231	46.8946
1.83999e+08	6.04e+18	6.3081e+18	44.4615	46.5238
1.85001e+08	5.9887e+18	6.2558e+18	44.0669	46.1215
1.86e+08	5.9672e+18	6.2318e+18	43.9015	45.9369
1.86999e+08	5.944e+18	6.2061e+18	43.7231	45.7392
1.88001e+08	5.8725e+18	6.1341e+18	43.1731	45.1854
1.89e+08	5.8444e+18	6.1038e+18	42.9569	44.9523
1.89999e+08	5.8206e+18	6.0778e+18	42.7738	44.7523
1.91001e+08	5.7902e+18	6.0448e+18	42.54	44.4985
1.92e+08	5.7645e+18	6.0167e+18	42.3423	44.2823
1.92998e+08	5.7278e+18	5.9779e+18	42.06	43.9838
1.94001e+08	5.6932e+18	5.9414e+18	41.7938	43.7031
1.94999e+08	5.6865e+18	5.9315e+18	41.7423	43.6269
1.96001e+08	5.6195e+18	5.8633e+18	41.2269	43.1023
1.97e+08	5.5865e+18	5.8282e+18	40.9731	42.8323
1.97999e+08	5.5378e+18	5.778e+18	40.5985	42.4462
1.99001e+08	5.49e+18	5.7287e+18	40.2308	42.0669
200000000	5.4421e+18	5.6797e+18	39.8623	41.69
2.00999e+08	5.4232e+18	5.6581e+18	39.7169	41.5238
2.02001e+08	5.3792e+18	5.6123e+18	39.3785	41.1715
2.03e+08	5.3478e+18	5.5789e+18	39.1369	40.9146
2.03999e+08	5.3578e+18	5.5854e+18	39.2138	40.9646
2.05001e+08	5.4231e+18	5.6455e+18	39.7162	41.4269
2.05999e+08	5.3905e+18	5.6101e+18	39.4654	41.1546
2.07002e+08	5.3231e+18	5.5411e+18	38.9469	40.6238
2.08e+08	5.3099e+18	5.5254e+18	38.8454	40.5031
2.08999e+08	5.2698e+18	5.4835e+18	38.5369	40.1808
2.10001e+08	5.1878e+18	5.4007e+18	37.9062	39.5438
2.11e+08	5.1647e+18	5.3757e+18	37.7285	39.3515
2.11999e+08	5.1182e+18	5.3276e+18	37.3708	38.9815
2.13001e+08	5.0746e+18	5.2824e+18	37.0354	38.6338
2.14e+08	5.0673e+18	5.2725e+18	36.9792	38.5577
2.14999e+08	5.0044e+18	5.2083e+18	36.4954	38.0638
2.16001e+08	4.9916e+18	5.193e+18	36.3969	37.9462
2.17e+08	4.9371e+18	5.1372e+18	35.9777	37.5169
2.17998e+08	4.9064e+18	5.1045e+18	35.7415	37.2654
2.19001e+08	4.8656e+18	5.0622e+18	35.4277	36.94
2.19999e+08	4.8588e+18	5.0525e+18	35.3754	36.8654
2.21001e+08	4.807e+18	4.9994e+18	34.9769	36.4569
2.22e+08	4.7558e+18	4.9468e+18	34.5831	36.0523
2.22999e+08	4.7683e+18	4.9565e+18	34.6792	36.1269
2.24001e+08	4.7431e+18	4.9287e+18	34.4854	35.9131
225000000	4.7041e+18	4.8881e+18	34.1854	35.6008
2.25999e+08	4.6322e+18	4.8151e+18	33.6323	35.0392
2.27001e+08	4.5832e+18	4.7647e+18	33.2554	34.6515
2.28e+08	4.53e+18	4.7105e+18	32.8462	34.2346
2.28999e+08	4.4979e+18	4.6768e+18	32.5992	33.9754
2.30001e+08	4.4715e+18	4.6481e+18	32.3962	33.7546
2.30999e+08	4.4333e+18	4.6082e+18	32.1023	33.4477
2.32002e+08	4.3965e+18	4.5701e+18	31.8192	33.1546
2.33e+08	4.3475e+18	4.5192e+18	31.4423	32.7631
2.33999e+08	4.3393e+18	4.5089e+18	31.3792	32.6838
2.35001e+08	4.3283e+18	4.4957e+18	31.2946	32.5823
2.36e+08	4.2724e+18	4.4383e+18	30.8646	32.1408
2.36999e+08	4.2466e+18	4.4109e+18	30.6662	31.93
2.38001e+08	4.2191e+18	4.3814e+18	30.4546	31.7031
2.39e+08	4.2107e+18	4.3708e+18	30.39	31.6215
2.39999e+08	4.1672e+18	4.3258e+18	30.0554	31.2754
2.41001e+08	4.1513e+18	4.3078e+18	29.9331	31.1369
2.42e+08	4.1332e+18	4.2876e+18	29.7938	30.9815
2.42998e+08	4.1231e+18	4.2751e+18	29.7162	30.8854
2.44001e+08	4.0738e+18	4.2247e+18	29.3369	30.4977
2.44999e+08	4.0306e+18	4.1798e+18	29.0046	30.1523
2.46001e+08	3.989e+18	4.1366e+18	28.6846	29.82
2.47e+08	3.9377e+18	4.0842e+18	28.29	29.4169
2.47999e+08	3.9244e+18	4.0691e+18	28.1877	29.3008
2.49001e+08	3.908e+18	4.0508e+18	28.0615	29.16
250000000	3.8887e+18	4.0296e+18	27.9131	28.9969
2.50999e+08	3.8804e+18	4.0194e+18	27.8492	28.9185
2.52001e+08	3.8328e+18	3.9702e+18	27.4831	28.54
2.53e+08	3.8046e+18	3.9404e+18	27.2662	28.3108
2.53999e+08	3.7827e+18	3.9167e+18	27.0977	28.1285
2.55001e+08	3.7491e+18	3.8818e+18	26.8392	27.86
2.55999e+08	3.6996e+18	3.8308e+18	26.4585	27.4677
2.57002e+08	3.6526e+18	3.7826e+18	26.0969	27.0969
2.58e+08	3.6084e+18	3.7374e+18	25.7569	26.7492
2.58999e+08	3.5808e+18	3.7079e+18	25.5446	26.5223
2.60001e+08	3.525e+18	3.6511e+18	25.1154	26.0854
2.61e+08	3.4842e+18	3.6092e+18	24.8015	25.7631
2.61999e+08	3.4956e+18	3.6185e+18	24.8892	25.8346
2.63001e+08	3.4709e+18	3.5921e+18	24.6992	25.6315
2.64e+08	3.449e+18	3.5688e+18	24.5308	25.4523
2.64999e+08	3.4168e+18	3.5351e+18	24.2831	25.1931
2.66001e+08	3.3768e+18	3.4939e+18	23.9754	24.8762
2.67e+08	3.3378e+18	3.4535e+18	23.6754	24.5654
2.67998e+08	3.3027e+18	3.417e+18	23.4054	24.2846
2.69001e+08	3.2957e+18	3.4086e+18	23.3515	24.22
2.69999e+08	3.2609e+18	3.3721e+18	23.0838	23.9392
2.71001e+08	3.2176e+18	3.3282e+18	22.7508	23.6015
2.72e+08	3.2027e+18	3.3114e+18	22.6362	23.4723
2.72999e+08	3.2002e+18	3.3075e+18	22.6169	23.4423
2.74001e+08	3.1563e+18	3.2622e+18	22.2792	23.0938
275000000	3.1322e+18	3.2368e+18	22.0938	22.8985
2.75999e+08	3.102e+18	3.2052e+18	21.8615	22.6554
2.77001e+08	3.1011e+18	3.2028e+18	21.8546	22.6369
2.78e+08	3.0852e+18	3.1853e+18	21.7323	22.5023
2.78999e+08	3.0754e+18	3.1742e+18	21.6569	22.4169
2.80001e+08	3.0509e+18	3.1483e+18	21.4685	22.2177
2.80999e+08	3.0256e+18	3.1215e+18	21.2738	22.0115
2.82002e+08	3.0011e+18	3.0958e+18	21.0854	21.8138
2.83e+08	2.9663e+18	3.0598e+18	20.8177	21.5369
2.83999e+08	2.9247e+18	3.0174e+18	20.4977	21.2108
2.85001e+08	2.9093e+18	3.0005e+18	20.3792	21.0808
2.86e+08	2.8959e+18	2.9857e+18	20.2762	20.9669
2.86999e+08	2.854e+18	2.9429e+18	19.9538	20.6377
2.88001e+08	2.8215e+18	2.9089e+18	19.7038	20.3762
2.89e+08	2.8165e+18	2.9029e+18	19.6654	20.33
2.89999e+08	2.783e+18	2.8683e+18	19.4077	20.0638
2.91001e+08	2.7754e+18	2.8594e+18	19.3492	19.9954
2.92e+08	2.7548e+18	2.8377e+18	19.1908	19.8285
2.92998e+08	2.7413e+18	2.8229e+18	19.0869	19.7146
2.94001e+08	2.7066e+18	2.7871e+18	18.82	19.4392
2.94999e+08	2.6817e+18	2.7612e+18	18.6285	19.24
2.96001e+08	2.6822e+18	2.7604e+18	18.6323	19.2338
2.97e+08	2.6377e+18	2.7152e+18	18.29	18.8862
2.97999e+08	2.635e+18	2.711e+18	18.2692	18.8538
2.99001e+08	2.6111e+18	2.6863e+18	18.0854	18.6638
300000000	2.5974e+18	2.6715e+18	17.98	18.55
3.00999e+08	2.5782e+18	2.6509e+18	17.8323	18.3915
3.02001e+08	2.5536e+18	2.6255e+18	17.6431	18.1962
3.03e+08	2.5192e+18	2.5901e+18	17.3785	17.9238
3.03999e+08	2.4814e+18	2.5515e+18	17.0877	17.6269
3.05001e+08	2.4698e+18	2.5386e+18	16.9985	17.5277
3.05999e+08	2.4413e+18	2.5093e+18	16.7792	17.3023
3.07002e+08	2.4358e+18	2.503e+18	16.7369	17.2538
3.08e+08	2.3959e+18	2.4622e+18	16.43	16.94
3.08999e+08	2.4032e+18	2.4684e+18	16.4862	16.9877
3.10001e+08	2.3934e+18	2.4574e+18	16.4108	16.9031
3.11e+08	2.3774e+18	2.4402e+18	16.2877	16.7708
3.11999e+08	2.379e+18	2.4409e+18	16.3	16.7762
3.13001e+08	2.3383e+18	2.3994e+18	15.9869	16.4569
3.14e+08	2.3075e+18	2.368e+18	15.75	16.2154
3.14999e+08	2.2864e+18	2.346e+18	15.5877	16.0462
3.16001e+08	2.2694e+18	2.3281e+18	15.4569	15.9085
3.17e+08	2.2497e+18	2.3076e+18	15.3054	15.7508
3.17986e+08	2.2165e+18	2.2737e+18	15.05	15.49
3.19001e+08	2.1825e+18	2.2388e+18	14.7885	15.2215
3.20015e+08	2.1646e+18	2.2202e+18	14.6508	15.0785
3.20998e+08	2.143e+18	2.1976e+18	14.4846	14.9046
3.22013e+08	2.1389e+18	2.1928e+18	14.4531	14.8677
3.22996e+08	2.1078e+18	2.1609e+18	14.2138	14.6223
3.24011e+08	2.095e+18	2.1472e+18	14.1154	14.5169
3.24994e+08	2.0843e+18	2.1361e+18	14.0331	14.4315
3.26008e+08	2.0985e+18	2.1491e+18	14.1423	14.5315
3.26991e+08	2.0693e+18	2.1191e+18	13.9177	14.3008
3.28006e+08	2.1154e+18	2.1642e+18	14.2723	14.6477
3.28989e+08	2.0771e+18	2.1254e+18	13.9777	14.3492
3.30004e+08	2.0445e+18	2.0919e+18	13.7269	14.0915
3.30987e+08	2.0197e+18	2.0665e+18	13.5362	13.8962
3.32002e+08	2.0084e+18	2.0546e+18	13.4492	13.8046
3.32985e+08	1.9747e+18	2.02e+18	13.19	13.5385
3.33999e+08	1.95e+18	1.9949e+18	13	13.3454
3.35014e+08	1.9385e+18	1.9827e+18	12.9115	13.2515
3.35997e+08	1.9135e+18	1.9571e+18	12.7192	13.0546
3.37012e+08	1.9126e+18	1.9553e+18	12.7123	13.0408
3.37995e+08	1.8815e+18	1.9237e+18	12.4731	12.7977
3.39009e+08	1.8547e+18	1.8963e+18	12.2669	12.5869
3.39992e+08	1.8768e+18	1.9179e+18	12.4369	12.7531
3.41007e+08	1.8913e+18	1.9314e+18	12.5485	12.8569
3.4199e+08	1.8841e+18	1.9234e+18	12.4931	12.7954
3.43005e+08	1.8528e+18	1.8917e+18	12.2523	12.5515
3.43988e+08	1.8426e+18	1.8809e+18	12.1738	12.4685
3.45003e+08	1.8352e+18	1.8728e+18	12.1169	12.4062
3.45986e+08	1.8024e+18	1.8394e+18	11.8646	12.1492
3.47e+08	1.7882e+18	1.8247e+18	11.7554	12.0362
3.48015e+08	1.7797e+18	1.8155e+18	11.69	11.9654
3.48998e+08	1.7672e+18	1.8028e+18	11.5938	11.8677
3.50013e+08	1.7436e+18	1.7783e+18	11.4123	11.6792
3.50996e+08	1.7447e+18	1.779e+18	11.4208	11.6846
3.5201e+08	1.7283e+18	1.7621e+18	11.2946	11.5546
3.52993e+08	1.7091e+18	1.7421e+18	11.1469	11.4008
3.54008e+08	1.6936e+18	1.7262e+18	11.0277	11.2785
3.54991e+08	1.6702e+18	1.7025e+18	10.8477	11.0962
3.56006e+08	1.6529e+18	1.6845e+18	10.7146	10.9577
3.56989e+08	1.6577e+18	1.6886e+18	10.7515	10.9892
3.58004e+08	1.6539e+18	1.6845e+18	10.7223	10.9577
3.58987e+08	1.6263e+18	1.6565e+18	10.51	10.7423
3.60001e+08	1.605e+18	1.6348e+18	10.3462	10.5754
3.60984e+08	1.6057e+18	1.6349e+18	10.3515	10.5762
3.61999e+08	1.5798e+18	1.6086e+18	10.1523	10.3738
3.63014e+08	1.5706e+18	1.5989e+18	10.0815	10.2992
3.63997e+08	1.5694e+18	1.5975e+18	10.0723	10.2885
3.65011e+08	1.5452e+18	1.573e+18	9.88615	10.1
3.65994e+08	1.5223e+18	1.5492e+18	9.71	9.91692
3.67009e+08	1.5001e+18	1.5265e+18	9.53923	9.74231
3.67992e+08	1.4948e+18	1.5212e+18	9.49846	9.70154
3.69007e+08	1.4723e+18	1.498e+18	9.32538	9.52308
3.6999e+08	1.4567e+18	1.482e+18	9.20538	9.4
3.71005e+08	1.4366e+18	1.4616e+18	9.05077	9.24308
3.71988e+08	1.4211e+18	1.4456e+18	8.93154	9.12
3.73002e+08	1.4059e+18	1.4302e+18	8.81462	9.00154
3.73985e+08	1.3881e+18	1.4122e+18	8.67769	8.86308
375000000	1.3704e+18	1.3939e+18	8.54154	8.72231
3.76015e+08	1.3536e+18	1.3767e+18	8.41231	8.59
3.76998e+08	1.3423e+18	1.3652e+18	8.32538	8.50154
3.78012e+08	1.3334e+18	1.3558e+18	8.25692	8.42923
3.78995e+08	1.3239e+18	1.346e+18	8.18385	8.35385
3.8001e+08	1.306e+18	1.3277e+18	8.04615	8.21308
3.80993e+08	1.2898e+18	1.3112e+18	7.92154	8.08615
3.82008e+08	1.3009e+18	1.3218e+18	8.00692	8.16769
3.82991e+08	1.2823e+18	1.3031e+18	7.86385	8.02385
3.84006e+08	1.2679e+18	1.2883e+18	7.75308	7.91
3.84989e+08	1.2522e+18	1.2723e+18	7.63231	7.78692
3.86003e+08	1.2413e+18	1.2609e+18	7.54846	7.69923
3.86986e+08	1.2309e+18	1.2503e+18	7.46846	7.61769
3.88001e+08	1.2399e+18	1.2589e+18	7.53769	7.68385
3.89016e+08	1.2353e+18	1.2539e+18	7.50231	7.64538
3.89999e+08	1.2188e+18	1.2372e+18	7.37538	7.51692
3.91013e+08	1.2018e+18	1.22e+18	7.24462	7.38462
3.91996e+08	1.1873e+18	1.2052e+18	7.13308	7.27077
3.93011e+08	1.1743e+18	1.192e+18	7.03308	7.16923
3.93994e+08	1.1619e+18	1.1791e+18	6.93769	7.07
3.95009e+08	1.1644e+18	1.1813e+18	6.95692	7.08692
3.95992e+08	1.1467e+18	1.1632e+18	6.82077	6.94769
3.97007e+08	1.1315e+18	1.1479e+18	6.70385	6.83
3.9799e+08	1.1176e+18	1.1337e+18	6.59692	6.72077
3.99004e+08	1.1038e+18	1.1197e+18	6.49077	6.61308
3.99987e+08	1.0927e+18	1.1083e+18	6.40538	6.52538
4.01002e+08	1.0876e+18	1.1031e+18	6.36615	6.48538
4.01985e+08	1.0843e+18	1.0995e+18	6.34077	6.45769
4.03e+08	1.0919e+18	1.1067e+18	6.39923	6.51308
4.04014e+08	1.0736e+18	1.0882e+18	6.25846	6.37077
4.04997e+08	1.0688e+18	1.083e+18	6.22154	6.33077
4.06012e+08	1.0561e+18	1.0702e+18	6.12385	6.23231
4.06995e+08	1.0469e+18	1.0609e+18	6.05308	6.16077
4.0801e+08	1.0342e+18	1.0482e+18	5.95538	6.06308
4.08993e+08	1.0225e+18	1.0358e+18	5.86538	5.96769
4.10008e+08	1.0125e+18	1.0256e+18	5.78846	5.88923
4.10991e+08	1.0027e+18	1.0158e+18	5.71308	5.81385
4.12005e+08	1.0127e+18	1.0256e+18	5.79	5.88923
4.12988e+08	9.9998e+17	1.0128e+18	5.69215	5.79077
4.14003e+08	9.9885e+17	1.011e+18	5.68346	5.77692
4.14986e+08	9.8481e+17	9.9691e+17	5.57546	5.66854
4.16001e+08	9.7223e+17	9.8408e+17	5.47869	5.56985
4.17015e+08	9.6794e+17	9.7984e+17	5.44569	5.53723
4.17998e+08	9.8464e+17	9.9611e+17	5.57415	5.66238
4.19013e+08	9.7041e+17	9.8186e+17	5.46469	5.55277
4.19996e+08	9.5822e+17	9.6934e+17	5.37092	5.45646
4.21011e+08	9.4564e+17	9.5686e+17	5.27415	5.36046
4.21994e+08	9.6669e+17	9.7743e+17	5.43608	5.51869
4.23009e+08	9.5342e+17	9.6374e+17	5.334	5.41338
4.23992e+08	9.4126e+17	9.5156e+17	5.24046	5.31969
4.25006e+08	9.3293e+17	9.4339e+17	5.17638	5.25685
4.25989e+08	9.2992e+17	9.4006e+17	5.15323	5.23123
4.27004e+08	9.1742e+17	9.2726e+17	5.05708	5.13277
4.27987e+08	9.0715e+17	9.1695e+17	4.97808	5.05346
4.29002e+08	8.9622e+17	9.057e+17	4.894	4.96692
4.29985e+08	8.8965e+17	8.9887e+17	4.84346	4.91438
4.30999e+08	8.7926e+17	8.8862e+17	4.76354	4.83554
4.32014e+08	8.6925e+17	8.787e+17	4.68654	4.75923
4.32997e+08	8.9234e+17	9.0129e+17	4.86415	4.933
4.34012e+08	8.7827e+17	8.8707e+17	4.75592	4.82362
4.34995e+08	8.6726e+17	8.7595e+17	4.67123	4.73808
4.3601e+08	8.5685e+17	8.6518e+17	4.59115	4.65523
4.36993e+08	8.472e+17	8.5544e+17	4.51692	4.58031
4.38007e+08	8.4051e+17	8.4879e+17	4.46546	4.52915
4.3899e+08	8.3158e+17	8.3997e+17	4.39677	4.46131
4.40005e+08	8.2271e+17	8.3065e+17	4.32854	4.38962
4.40988e+08	8.1453e+17	8.2217e+17	4.26562	4.32438
4.42003e+08	8.2507e+17	8.3252e+17	4.34669	4.404
4.42986e+08	8.2004e+17	8.2745e+17	4.308	4.365
4.44001e+08	8.0997e+17	8.1748e+17	4.23054	4.28831
4.45015e+08	8.0066e+17	8.0793e+17	4.15892	4.21485
4.45998e+08	7.933e+17	8.0045e+17	4.10231	4.15731
4.47013e+08	7.8496e+17	7.9214e+17	4.03815	4.09338
4.47996e+08	7.7718e+17	7.8436e+17	3.97831	4.03354
4.49011e+08	7.6965e+17	7.7634e+17	3.92038	3.97185
4.49994e+08	7.6657e+17	7.731e+17	3.89669	3.94692
4.51008e+08	7.627e+17	7.6936e+17	3.86692	3.91815
4.51991e+08	7.5573e+17	7.621e+17	3.81331	3.86231
4.53006e+08	7.4844e+17	7.5463e+17	3.75723	3.80485
4.53989e+08	7.4246e+17	7.488e+17	3.71123	3.76
4.55004e+08	7.3561e+17	7.4178e+17	3.65854	3.706
4.55987e+08	7.2924e+17	7.3539e+17	3.60954	3.65685
4.57002e+08	7.2297e+17	7.2898e+17	3.56131	3.60754
4.57985e+08	7.1707e+17	7.2311e+17	3.51592	3.56238
4.58999e+08	7.1089e+17	7.1672e+17	3.46838	3.51323
4.60014e+08	7.0468e+17	7.1035e+17	3.42062	3.46423
4.60997e+08	7.072e+17	7.1267e+17	3.44	3.48208
4.62012e+08	7.0004e+17	7.0538e+17	3.38492	3.426
4.62995e+08	6.9363e+17	6.9907e+17	3.33562	3.37746
4.64009e+08	6.8741e+17	6.9279e+17	3.28777	3.32915
4.64992e+08	6.8168e+17	6.8692e+17	3.24369	3.284
4.66007e+08	6.8793e+17	6.9295e+17	3.29177	3.33038
4.6699e+08	6.8084e+17	6.8562e+17	3.23723	3.274
4.68005e+08	6.7598e+17	6.8076e+17	3.19985	3.23662
4.68988e+08	6.6999e+17	6.7495e+17	3.15377	3.19192
4.70003e+08	6.6413e+17	6.6899e+17	3.10869	3.14608
4.70986e+08	6.6005e+17	6.6463e+17	3.07731	3.11254
4.72e+08	6.5875e+17	6.6328e+17	3.06731	3.10215
4.73015e+08	6.5323e+17	6.5779e+17	3.02485	3.05992
4.73998e+08	6.4992e+17	6.5436e+17	2.99938	3.03354
4.75013e+08	6.4443e+17	6.4878e+17	2.95715	2.99062
4.75996e+08	6.3951e+17	6.437e+17	2.91931	2.95154
4.7701e+08	6.3446e+17	6.3864e+17	2.88046	2.91262
4.77993e+08	6.295e+17	6.3379e+17	2.84231	2.87531
4.79008e+08	6.2581e+17	6.2986e+17	2.81392	2.84508
4.79991e+08	6.2149e+17	6.2532e+17	2.78069	2.81015
4.81006e+08	6.2008e+17	6.241e+17	2.76985	2.80077
4.81989e+08	6.1706e+17	6.2106e+17	2.74662	2.77738
4.83004e+08	6.1532e+17	6.1926e+17	2.73323	2.76354
4.83987e+08	6.1678e+17	6.2043e+17	2.74446	2.77254
4.85001e+08	6.1163e+17	6.1536e+17	2.70485	2.73354
4.85984e+08	6.0676e+17	6.1047e+17	2.66738	2.69592
4.86999e+08	6.0443e+17	6.0798e+17	2.64946	2.67677
4.88014e+08	6.0183e+17	6.0525e+17	2.62946	2.65577
4.88997e+08	5.9892e+17	6.0222e+17	2.60708	2.63246
4.90011e+08	5.9439e+17	5.9765e+17	2.57223	2.59731
4.90994e+08	5.9017e+17	5.9328e+17	2.53977	2.56369
4.92009e+08	6.001e+17	6.0327e+17	2.61615	2.64054
4.92992e+08	5.9312e+17	5.9636e+17	2.56246	2.58738
4.94007e+08	5.8793e+17	5.9113e+17	2.52254	2.54715
4.9499e+08	5.8413e+17	5.8712e+17	2.49331	2.51631
4.96005e+08	5.7969e+17	5.8266e+17	2.45915	2.482
4.96988e+08	5.8395e+17	5.8691e+17	2.49192	2.51469
4.98002e+08	5.8118e+17	5.84e+17	2.47062	2.49231
4.98985e+08	5.7642e+17	5.7939e+17	2.434	2.45685
500000000	5.7245e+17	5.7522e+17	2.40346	2.42477
5.01015e+08	5.7268e+17	5.7553e+17	2.40523	2.42715
5.01998e+08	5.6869e+17	5.7127e+17	2.37454	2.39438
5.03012e+08	5.6438e+17	5.6704e+17	2.34138	2.36185
5.03995e+08	5.6043e+17	5.6307e+17	2.311	2.33131
5.0501e+08	5.567e+17	5.5923e+17	2.28231	2.30177
5.05993e+08	5.5305e+17	5.5564e+17	2.25423	2.27415
5.07008e+08	5.5129e+17	5.538e+17	2.24069	2.26
5.07991e+08	5.4878e+17	5.5143e+17	2.22138	2.24177
5.09006e+08	5.454e+17	5.4771e+17	2.19538	2.21315
5.09989e+08	5.4216e+17	5.4436e+17	2.17046	2.18738
5.11003e+08	5.559e+17	5.5815e+17	2.27615	2.29346
5.11986e+08	5.5005e+17	5.5243e+17	2.23115	2.24946
5.13001e+08	5.4554e+17	5.4781e+17	2.19646	2.21392
5.14016e+08	5.6131e+17	5.6351e+17	2.31777	2.33469
5.14999e+08	5.535e+17	5.5568e+17	2.25769	2.27446
5.16013e+08	5.6325e+17	5.6535e+17	2.33269	2.34885
5.16996e+08	5.562e+17	5.5821e+17	2.27846	2.29392
5.18011e+08	5.5103e+17	5.5298e+17	2.23869	2.25369
5.18994e+08	5.4663e+17	5.485e+17	2.20485	2.21923
5.20009e+08	5.4233e+17	5.4429e+17	2.17177	2.18685
5.20992e+08	5.3856e+17	5.4045e+17	2.14277	2.15731
5.22007e+08	5.5133e+17	5.5318e+17	2.241	2.25523
5.2299e+08	5.4405e+17	5.4586e+17	2.185	2.19892
5.24004e+08	5.3961e+17	5.4138e+17	2.15085	2.16446
5.24987e+08	5.3568e+17	5.3745e+17	2.12062	2.13423
5.26002e+08	5.3204e+17	5.3367e+17	2.09262	2.10515
5.26985e+08	5.2861e+17	5.3036e+17	2.06623	2.07969
5.28e+08	5.2547e+17	5.2707e+17	2.04208	2.05438
5.29014e+08	5.2396e+17	5.2563e+17	2.03046	2.04331
5.29997e+08	5.2097e+17	5.2268e+17	2.00746	2.02062
5.31012e+08	5.1783e+17	5.195e+17	1.98331	1.99615
5.31995e+08	5.1501e+17	5.1664e+17	1.96162	1.97415
5.3301e+08	5.1865e+17	5.2031e+17	1.98962	2.00238
5.33993e+08	5.1545e+17	5.1708e+17	1.965	1.97754
5.35008e+08	5.2822e+17	5.298e+17	2.06323	2.07538
5.35991e+08	5.2361e+17	5.251e+17	2.02777	2.03923
5.37005e+08	5.1957e+17	5.2093e+17	1.99669	2.00715
5.37988e+08	5.1612e+17	5.1764e+17	1.97015	1.98185
5.39003e+08	5.127e+17	5.1423e+17	1.94385	1.95562
5.39986e+08	5.0968e+17	5.1107e+17	1.92062	1.93131
5.41001e+08	5.0671e+17	5.0811e+17	1.89777	1.90854
5.42015e+08	5.0378e+17	5.0524e+17	1.87523	1.88646
5.42998e+08	5.0129e+17	5.0259e+17	1.85608	1.86608
5.44013e+08	4.9867e+17	4.9998e+17	1.83592	1.846
5.44996e+08	4.9608e+17	4.9745e+17	1.816	1.82654
5.46011e+08	4.9371e+17	4.9499e+17	1.79777	1.80762
5.46994e+08	4.9152e+17	4.9276e+17	1.78092	1.79046
5.48009e+08	4.8925e+17	4.9048e+17	1.76346	1.77292
5.48992e+08	4.8701e+17	4.8827e+17	1.74623	1.75592
5.50006e+08	4.8478e+17	4.8609e+17	1.72908	1.73915
5.50989e+08	4.8456e+17	4.8579e+17	1.72738	1.73685
5.52004e+08	4.8253e+17	4.8368e+17	1.71177	1.72062
5.52987e+08	4.8327e+17	4.8442e+17	1.71746	1.72631
5.54002e+08	4.8109e+17	4.8228e+17	1.70069	1.70985
5.54985e+08	4.79e+17	4.8012e+17	1.68462	1.69323
5.55999e+08	4.769e+17	4.7791e+17	1.66846	1.67623
5.57014e+08	4.7482e+17	4.7579e+17	1.65246	1.65992
5.57997e+08	4.7291e+17	4.7389e+17	1.63777	1.64531
5.59012e+08	4.7106e+17	4.7199e+17	1.62354	1.63069
5.59995e+08	4.6916e+17	4.7018e+17	1.60892	1.61677
5.6101e+08	4.674e+17	4.6832e+17	1.59538	1.60246
5.61993e+08	4.6563e+17	4.6658e+17	1.58177	1.58908
5.63007e+08	4.7394e+17	4.749e+17	1.64569	1.65308
5.6399e+08	4.7071e+17	4.7165e+17	1.62085	1.62808
5.65005e+08	4.6824e+17	4.6902e+17	1.60185	1.60785
5.65988e+08	4.8471e+17	4.8558e+17	1.72854	1.73523
5.67003e+08	4.7968e+17	4.8054e+17	1.68985	1.69646
5.67986e+08	4.763e+17	4.771e+17	1.66385	1.67
5.69001e+08	4.7322e+17	4.7403e+17	1.64015	1.64638
5.70015e+08	4.7054e+17	4.713e+17	1.61954	1.62538
5.70998e+08	4.6825e+17	4.6898e+17	1.60192	1.60754
5.72013e+08	4.6583e+17	4.6665e+17	1.58331	1.58962
5.72996e+08	4.651e+17	4.6585e+17	1.57769	1.58346
5.74011e+08	4.6318e+17	4.6381e+17	1.56292	1.56777
5.74994e+08	4.6117e+17	4.6185e+17	1.54746	1.55269
5.76008e+08	4.5948e+17	4.6007e+17	1.53446	1.539
5.76991e+08	4.578e+17	4.5833e+17	1.52154	1.52562
5.78006e+08	4.5603e+17	4.5663e+17	1.50792	1.51254
5.78989e+08	4.5437e+17	4.5494e+17	1.49515	1.49954
5.80004e+08	4.5278e+17	4.5331e+17	1.48292	1.487
5.80987e+08	4.5749e+17	4.5803e+17	1.51915	1.52331
5.82002e+08	4.5573e+17	4.5632e+17	1.50562	1.51015
5.82985e+08	4.5389e+17	4.5435e+17	1.49146	1.495
5.83999e+08	4.5218e+17	4.5261e+17	1.47831	1.48162
5.85014e+08	4.5043e+17	4.5095e+17	1.46485	1.46885
5.85997e+08	4.4893e+17	4.4942e+17	1.45331	1.45708
5.87012e+08	4.4728e+17	4.4781e+17	1.44062	1.44469
5.87995e+08	4.4583e+17	4.4631e+17	1.42946	1.43315
5.89009e+08	4.4453e+17	4.4491e+17	1.41946	1.42238
5.89992e+08	4.4316e+17	4.4362e+17	1.40892	1.41246
5.91007e+08	4.4415e+17	4.4452e+17	1.41654	1.41938
5.9199e+08	4.5079e+17	4.5116e+17	1.46762	1.47046
5.93005e+08	4.4854e+17	4.4892e+17	1.45031	1.45323
5.93988e+08	4.4651e+17	4.4688e+17	1.43469	1.43754
5.95003e+08	4.4462e+17	4.4501e+17	1.42015	1.42315
5.95986e+08	4.4313e+17	4.4347e+17	1.40869	1.41131
5.97e+08	4.4153e+17	4.4187e+17	1.39638	1.399
5.98015e+08	4.3995e+17	4.4035e+17	1.38423	1.38731
5.98998e+08	4.3859e+17	4.3898e+17	1.37377	1.37677
6.00013e+08	4.3726e+17	4.3763e+17	1.36354	1.36638
6.00996e+08	4.4448e+17	4.4482e+17	1.41908	1.42169
6.0201e+08	4.4207e+17	4.424e+17	1.40054	1.40308
6.02993e+08	4.4019e+17	4.4053e+17	1.38608	1.38869
6.04008e+08	4.3855e+17	4.3881e+17	1.37346	1.37546
6.04991e+08	4.3717e+17	4.3741e+17	1.36285	1.36469
6.06006e+08	4.3605e+17	4.3635e+17	1.35423	1.35654
6.06989e+08	4.3483e+17	4.3503e+17	1.34485	1.34638
6.08004e+08	4.3367e+17	4.3387e+17	1.33592	1.33746
6.08987e+08	4.3253e+17	4.3274e+17	1.32715	1.32877
6.10001e+08	4.3148e+17	4.3167e+17	1.31908	1.32054
6.10984e+08	4.3051e+17	4.3068e+17	1.31162	1.31292
6.11999e+08	4.2951e+17	4.2966e+17	1.30392	1.30508
6.13014e+08	4.2847e+17	4.2869e+17	1.29592	1.29762
6.13997e+08	4.2758e+17	4.2775e+17	1.28908	1.29038
6.15011e+08	4.2663e+17	4.2683e+17	1.28177	1.28331
6.15994e+08	4.257e+17	4.2591e+17	1.27462	1.27623
6.17009e+08	4.2484e+17	4.25e+17	1.268	1.26923
6.17992e+08	4.2396e+17	4.2414e+17	1.26123	1.26262
6.19007e+08	4.231e+17	4.2326e+17	1.25462	1.25585
6.1999e+08	4.2233e+17	4.225e+17	1.24869	1.25
6.21005e+08	4.2157e+17	4.2171e+17	1.24285	1.24392
6.21988e+08	4.2073e+17	4.2092e+17	1.23638	1.23785
6.23002e+08	4.1998e+17	4.2014e+17	1.23062	1.23185
6.23985e+08	4.1925e+17	4.1941e+17	1.225	1.22623
625000000	4.1858e+17	4.1872e+17	1.21985	1.22092
6.26015e+08	4.2177e+17	4.2195e+17	1.24438	1.24577
6.26998e+08	4.209e+17	4.211e+17	1.23769	1.23923
6.28012e+08	4.1995e+17	4.2012e+17	1.23038	1.23169
6.28995e+08	4.1908e+17	4.1925e+17	1.22369	1.225
6.3001e+08	4.182e+17	4.1838e+17	1.21692	1.21831
6.30993e+08	4.1735e+17	4.1756e+17	1.21038	1.212
6.32008e+08	4.1663e+17	4.1679e+17	1.20485	1.20608
6.32991e+08	4.158e+17	4.1603e+17	1.19846	1.20023
6.34006e+08	4.1509e+17	4.153e+17	1.193	1.19462
6.34989e+08	4.1444e+17	4.1464e+17	1.188	1.18954
6.36003e+08	4.1373e+17	4.1396e+17	1.18254	1.18431
6.36986e+08	4.2235e+17	4.2255e+17	1.24885	1.25038
6.38001e+08	4.2018e+17	4.204e+17	1.23215	1.23385
6.39016e+08	4.187e+17	4.1896e+17	1.22077	1.22277
6.39999e+08	4.1755e+17	4.1779e+17	1.21192	1.21377
6.41013e+08	4.165e+17	4.1677e+17	1.20385	1.20592
6.41996e+08	4.1561e+17	4.1584e+17	1.197	1.19877
6.43011e+08	4.1476e+17	4.15e+17	1.19046	1.19231
6.43994e+08	4.1399e+17	4.1422e+17	1.18454	1.18631
6.45009e+08	4.1315e+17	4.1342e+17	1.17808	1.18015
6.45992e+08	4.1252e+17	4.1274e+17	1.17323	1.17492
6.47007e+08	4.1188e+17	4.1209e+17	1.16831	1.16992
6.4799e+08	4.1115e+17	4.1141e+17	1.16269	1.16469
6.49004e+08	4.1042e+17	4.1071e+17	1.15708	1.15931
6.49987e+08	4.0979e+17	4.1007e+17	1.15223	1.15438
6.51002e+08	4.091e+17	4.0943e+17	1.14692	1.14946
6.51985e+08	4.085e+17	4.0883e+17	1.14231	1.14485
6.53e+08	4.0787e+17	4.0822e+17	1.13746	1.14015
6.54014e+08	4.0731e+17	4.0763e+17	1.13315	1.13562
6.54997e+08	4.0674e+17	4.0703e+17	1.12877	1.131
6.56012e+08	4.2711e+17	4.2742e+17	1.28546	1.28785
6.56995e+08	4.2204e+17	4.224e+17	1.24646	1.24923
6.5801e+08	4.2002e+17	4.2033e+17	1.23092	1.23331
6.58993e+08	4.1842e+17	4.1879e+17	1.21862	1.22146
6.60008e+08	4.1704e+17	4.1739e+17	1.208	1.21069
6.60991e+08	4.158e+17	4.1617e+17	1.19846	1.20131
6.62005e+08	4.1465e+17	4.1505e+17	1.18962	1.19269
6.62988e+08	4.1363e+17	4.1404e+17	1.18177	1.18492
6.64003e+08	4.1268e+17	4.1309e+17	1.17446	1.17762
6.64986e+08	4.1178e+17	4.1217e+17	1.16754	1.17054
6.66001e+08	4.1368e+17	4.1407e+17	1.18215	1.18515
6.67015e+08	4.1281e+17	4.1321e+17	1.17546	1.17854
6.67998e+08	4.1183e+17	4.1224e+17	1.16792	1.17108
6.69013e+08	4.1091e+17	4.1131e+17	1.16085	1.16392
6.69996e+08	4.1008e+17	4.1045e+17	1.15446	1.15731
6.71011e+08	4.0918e+17	4.0958e+17	1.14754	1.15062
6.71994e+08	4.0841e+17	4.0879e+17	1.14162	1.14454
6.73009e+08	4.0768e+17	4.0804e+17	1.136	1.13877
6.73992e+08	4.0688e+17	4.073e+17	1.12985	1.13308
6.75006e+08	4.062e+17	4.0661e+17	1.12462	1.12777
6.75989e+08	4.0556e+17	4.059e+17	1.11969	1.12231
6.77004e+08	4.0488e+17	4.0525e+17	1.11446	1.11731
6.77987e+08	4.0417e+17	4.046e+17	1.109	1.11231
6.79002e+08	4.0349e+17	4.0392e+17	1.10377	1.10708
6.79985e+08	4.0288e+17	4.0325e+17	1.09908	1.10192
6.80999e+08	4.0222e+17	4.0261e+17	1.094	1.097
6.82014e+08	4.016e+17	4.0205e+17	1.08923	1.09269
6.82997e+08	4.2078e+17	4.2118e+17	1.23677	1.23985
6.84012e+08	4.1563e+17	4.1599e+17	1.19715	1.19992
6.84995e+08	4.1372e+17	4.1413e+17	1.18246	1.18562
6.8601e+08	4.1208e+17	4.1249e+17	1.16985	1.173
6.86993e+08	4.1073e+17	4.1107e+17	1.15946	1.16208
6.88007e+08	4.096e+17	4.0995e+17	1.15077	1.15346
6.8899e+08	4.0855e+17	4.0889e+17	1.14269	1.14531
6.90005e+08	4.0753e+17	4.0792e+17	1.13485	1.13785
6.90988e+08	4.0657e+17	4.0696e+17	1.12746	1.13046
6.92003e+08	4.0565e+17	4.0604e+17	1.12038	1.12338
6.92986e+08	4.0504e+17	4.054e+17	1.11569	1.11846
6.94001e+08	4.0422e+17	4.0454e+17	1.10938	1.11185
6.95015e+08	4.0344e+17	4.0374e+17	1.10338	1.10569
6.95998e+08	4.0268e+17	4.0302e+17	1.09754	1.10015
6.97013e+08	4.0195e+17	4.0225e+17	1.09192	1.09423
6.97996e+08	4.0129e+17	4.0155e+17	1.08685	1.08885
6.99011e+08	4.0169e+17	4.0196e+17	1.08992	1.092
6.99994e+08	4.1633e+17	4.1657e+17	1.20254	1.20438
7.01008e+08	4.126e+17	4.1284e+17	1.17385	1.17569
7.01991e+08	4.1064e+17	4.1092e+17	1.15877	1.16092
7.03006e+08	4.0915e+17	4.0941e+17	1.14731	1.14931
7.03989e+08	4.0787e+17	4.0811e+17	1.13746	1.13931
7.05004e+08	4.0668e+17	4.0694e+17	1.12831	1.13031
7.05987e+08	4.0561e+17	4.0587e+17	1.12008	1.12208
7.07002e+08	4.0464e+17	4.0486e+17	1.11262	1.11431
7.07985e+08	4.037e+17	4.0397e+17	1.10538	1.10746
7.08999e+08	4.0281e+17	4.0306e+17	1.09854	1.10046
7.10014e+08	4.0193e+17	4.0216e+17	1.09177	1.09354
7.10997e+08	4.0121e+17	4.0144e+17	1.08623	1.088
7.12012e+08	4.0041e+17	4.0065e+17	1.08008	1.08192
7.12995e+08	3.9968e+17	3.9993e+17	1.07446	1.07638
7.14009e+08	3.9899e+17	3.9924e+17	1.06915	1.07108
7.14992e+08	4.004e+17	4.0058e+17	1.08	1.08138
7.16007e+08	3.9967e+17	3.9988e+17	1.07438	1.076
7.1699e+08	3.9893e+17	3.9912e+17	1.06869	1.07015
7.18005e+08	3.9829e+17	3.9842e+17	1.06377	1.06477
7.18988e+08	3.9754e+17	3.9776e+17	1.058	1.05969
7.20003e+08	3.9684e+17	3.9702e+17	1.05262	1.054
7.20986e+08	3.9616e+17	3.9636e+17	1.04738	1.04892
7.22e+08	3.9553e+17	3.957e+17	1.04254	1.04385
7.23015e+08	3.9498e+17	3.9512e+17	1.03831	1.03938
7.23998e+08	3.9438e+17	3.9454e+17	1.03369	1.03492
7.25013e+08	3.9385e+17	3.9395e+17	1.02962	1.03038
7.25996e+08	3.9332e+17	3.9349e+17	1.02554	1.02685
7.2701e+08	3.928e+17	3.9295e+17	1.02154	1.02269
7.27993e+08	3.9225e+17	3.9239e+17	1.01731	1.01838
7.29008e+08	3.9182e+17	3.9191e+17	1.014	1.01469
7.29991e+08	3.9135e+17	3.915e+17	1.01038	1.01154
7.31006e+08	3.9089e+17	3.9098e+17	1.00685	1.00754
7.31989e+08	3.907e+17	3.9082e+17	1.00538	1.00631
7.33004e+08	3.9023e+17	3.9033e+17	1.00177	1.00254
7.33987e+08	3.9041e+17	3.9051e+17	1.00315	1.00392
7.35001e+08	3.8995e+17	3.9007e+17	0.999615	1.00054
7.35984e+08	3.8952e+17	3.8962e+17	0.996308	0.997077
7.36999e+08	3.9055e+17	3.9063e+17	1.00423	1.00485
7.38014e+08	3.9007e+17	3.9018e+17	1.00054	1.00138
7.38997e+08	3.8953e+17	3.8962e+17	0.996385	0.997077
7.40011e+08	3.8897e+17	3.8904e+17	0.992077	0.992615
7.40994e+08	3.8852e+17	3.8859e+17	0.988615	0.989154
7.42009e+08	3.8807e+17	3.8812e+17	0.985154	0.985538
7.42992e+08	3.8755e+17	3.8765e+17	0.981154	0.981923
7.44007e+08	3.8717e+17	3.8723e+17	0.978231	0.978692
7.4499e+08	3.8678e+17	3.8686e+17	0.975231	0.975846
7.46005e+08	3.9208e+17	3.9214e+17	1.016	1.01646
7.46988e+08	3.913e+17	3.9139e+17	1.01	1.01069
7.48002e+08	4.1406e+17	4.1414e+17	1.18508	1.18569
7.48985e+08	4.0875e+17	4.0881e+17	1.14423	1.14469
750000000	4.0654e+17	4.066e+17	1.12723	1.12769
7.51015e+08	4.0519e+17	4.053e+17	1.11685	1.11769
7.51998e+08	4.0365e+17	4.0374e+17	1.105	1.10569
7.53012e+08	4.0228e+17	4.0235e+17	1.09446	1.095
7.53995e+08	4.0115e+17	4.0124e+17	1.08577	1.08646
7.5501e+08	3.9998e+17	4.0003e+17	1.07677	1.07715
7.55993e+08	3.9906e+17	3.9911e+17	1.06969	1.07008
7.57008e+08	3.9823e+17	3.9828e+17	1.06331	1.06369
7.57991e+08	3.9743e+17	3.975e+17	1.05715	1.05769
7.59006e+08	3.9669e+17	3.9673e+17	1.05146	1.05177
7.59989e+08	3.9598e+17	3.9602e+17	1.046	1.04631
7.61003e+08	3.9528e+17	3.9531e+17	1.04062	1.04085
7.61986e+08	3.946e+17	3.9463e+17	1.03538	1.03562
7.63001e+08	3.9397e+17	3.9399e+17	1.03054	1.03069
7.64016e+08	3.934e+17	3.9345e+17	1.02615	1.02654
7.64999e+08	3.928e+17	3.9284e+17	1.02154	1.02185
7.66013e+08	3.9227e+17	3.9233e+17	1.01746	1.01792
7.66996e+08	3.9167e+17	3.9174e+17	1.01285	1.01338
7.68011e+08	3.9117e+17	3.9123e+17	1.009	1.00946
7.68994e+08	3.9068e+17	3.9072e+17	1.00523	1.00554
7.70009e+08	3.902e+17	3.9025e+17	1.00154	1.00192
7.70992e+08	3.897e+17	3.8976e+17	0.997692	0.998154
7.72007e+08	3.8928e+17	3.8929e+17	0.994462	0.994538
7.7299e+08	3.8885e+17	3.8887e+17	0.991154	0.991308
7.74004e+08	3.8839e+17	3.8842e+17	0.987615	0.987846
7.74987e+08	3.8797e+17	3.8801e+17	0.984385	0.984692
7.76002e+08	3.8757e+17	3.8762e+17	0.981308	0.981692
7.76985e+08	3.8719e+17	3.8722e+17	0.978385	0.978615
7.78e+08	3.8678e+17	3.868e+17	0.975231	0.975385
7.79014e+08	3.8646e+17	3.8649e+17	0.972769	0.973
7.79997e+08	3.8606e+17	3.8611e+17	0.969692	0.970077
7.81012e+08	3.8573e+17	3.8573e+17	0.967154	0.967154
7.81995e+08	3.8534e+17	3.8537e+17	0.964154	0.964385
7.8301e+08	3.8504e+17	3.8508e+17	0.961846	0.962154
7.83993e+08	3.8469e+17	3.8471e+17	0.959154	0.959308
7.85008e+08	3.8434e+17	3.8437e+17	0.956462	0.956692
7.85991e+08	3.8404e+17	3.8407e+17	0.954154	0.954385
7.87005e+08	3.8369e+17	3.8371e+17	0.951462	0.951615
7.87988e+08	3.8345e+17	3.8346e+17	0.949615	0.949692
7.89003e+08	3.8311e+17	3.8313e+17	0.947	0.947154
7.89986e+08	3.8283e+17	3.8287e+17	0.944846	0.945154
7.91001e+08	3.8256e+17	3.8257e+17	0.942769	0.942846
7.92015e+08	3.8224e+17	3.8227e+17	0.940308	0.940538
7.92998e+08	3.8199e+17	3.8202e+17	0.938385	0.938615
7.94013e+08	3.8169e+17	3.817e+17	0.936077	0.936154
7.94996e+08	3.8139e+17	3.8142e+17	0.933769	0.934
7.96011e+08	3.8112e+17	3.8113e+17	0.931692	0.931769
7.96994e+08	3.8084e+17	3.8085e+17	0.929538	0.929615
7.98009e+08	3.8058e+17	3.8061e+17	0.927538	0.927769
7.98992e+08	3.8136e+17	3.8138e+17	0.933538	0.933692
8.00006e+08	3.811e+17	3.811e+17	0.931538	0.931538
8.00989e+08	3.8078e+17	3.808e+17	0.929077	0.929231
8.02004e+08	3.8047e+17	3.8048e+17	0.926692	0.926769
8.02987e+08	3.8014e+17	3.8016e+17	0.924154	0.924308
8.04002e+08	3.7989e+17	3.799e+17	0.922231	0.922308
8.04985e+08	3.7963e+17	3.7964e+17	0.920231	0.920308
8.05999e+08	3.7935e+17	3.7936e+17	0.918077	0.918154
8.07014e+08	3.7909e+17	3.7911e+17	0.916077	0.916231
8.07997e+08	3.7885e+17	3.7887e+17	0.914231	0.914385
8.09012e+08	3.786e+17	3.786e+17	0.912308	0.912308
8.09995e+08	3.7838e+17	3.7839e+17	0.910615	0.910692
8.1101e+08	3.7818e+17	3.782e+17	0.909077	0.909231
8.11993e+08	3.7796e+17	3.7796e+17	0.907385	0.907385
8.13007e+08	3.7774e+17	3.7775e+17	0.905692	0.905769
8.1399e+08	3.7756e+17	3.7757e+17	0.904308	0.904385
8.15005e+08	3.7733e+17	3.7735e+17	0.902538	0.902692
8.15988e+08	3.7714e+17	3.7714e+17	0.901077	0.901077
8.17003e+08	3.7695e+17	3.7697e+17	0.899615	0.899769
8.17986e+08	3.767e+17	3.7672e+17	0.897692	0.897846
8.19001e+08	3.7647e+17	3.7648e+17	0.895923	0.896
8.20015e+08	3.7625e+17	3.7627e+17	0.894231	0.894385
8.20998e+08	3.7601e+17	3.7601e+17	0.892385	0.892385
8.22013e+08	3.7581e+17	3.7583e+17	0.890846	0.891
8.22996e+08	3.7567e+17	3.7567e+17	0.889769	0.889769
8.24011e+08	3.7543e+17	3.7544e+17	0.887923	0.888
8.24994e+08	3.7524e+17	3.7525e+17	0.886462	0.886538
8.26008e+08	3.7505e+17	3.7507e+17	0.885	0.885154
8.26991e+08	3.7481e+17	3.7483e+17	0.883154	0.883308
8.28006e+08	3.7465e+17	3.7465e+17	0.881923	0.881923
8.28989e+08	3.7449e+17	3.7449e+17	0.880692	0.880692
8.30004e+08	3.7432e+17	3.7432e+17	0.879385	0.879385
8.30987e+08	3.7414e+17	3.7415e+17	0.878	0.878077
8.32002e+08	3.7399e+17	3.7399e+17	0.876846	0.876846
8.32985e+08	3.7382e+17	3.7382e+17	0.875538	0.875538
8.33999e+08	3.7364e+17	3.7365e+17	0.874154	0.874231
8.35014e+08	3.7355e+17	3.7355e+17	0.873462	0.873462
8.35997e+08	3.7336e+17	3.7337e+17	0.872	0.872077
8.37012e+08	3.7323e+17	3.7323e+17	0.871	0.871
8.37995e+08	3.7312e+17	3.7313e+17	0.870154	0.870231
8.39009e+08	3.73e+17	3.73e+17	0.869231	0.869231
8.39992e+08	3.7287e+17	3.7287e+17	0.868231	0.868231
8.41007e+08	3.7278e+17	3.7278e+17	0.867538	0.867538
8.4199e+08	3.7265e+17	3.7265e+17	0.866538	0.866538
8.43005e+08	3.7255e+17	3.7255e+17	0.865769	0.865769
8.43988e+08	3.7239e+17	3.7241e+17	0.864538	0.864692
8.45003e+08	3.7225e+17	3.7225e+17	0.863462	0.863462
8.45986e+08	3.7214e+17	3.7214e+17	0.862615	0.862615
8.47e+08	3.7207e+17	3.7207e+17	0.862077	0.862077
8.48015e+08	3.7193e+17	3.7193e+17	0.861	0.861
8.48998e+08	3.7177e+17	3.7177e+17	0.859769	0.859769
8.50013e+08	3.7169e+17	3.7169e+17	0.859154	0.859154
8.50996e+08	3.7157e+17	3.7157e+17	0.858231	0.858231
8.5201e+08	3.7147e+17	3.7147e+17	0.857462	0.857462
8.52993e+08	3.7133e+17	3.7134e+17	0.856385	0.856462
8.54008e+08	3.7118e+17	3.7119e+17	0.855231	0.855308
8.54991e+08	3.7109e+17	3.7109e+17	0.854538	0.854538
8.56006e+08	3.7096e+17	3.7097e+17	0.853538	0.853615
8.56989e+08	3.7085e+17	3.7086e+17	0.852692	0.852769
8.58004e+08	3.7072e+17	3.7072e+17	0.851692	0.851692
8.58987e+08	3.7065e+17	3.7065e+17	0.851154	0.851154
8.60001e+08	3.7055e+17	3.7055e+17	0.850385	0.850385
8.60984e+08	3.7047e+17	3.7047e+17	0.849769	0.849769
8.61999e+08	3.7036e+17	3.7036e+17	0.848923	0.848923
8.63014e+08	3.7027e+17	3.7027e+17	0.848231	0.848231
8.63997e+08	3.7021e+17	3.7021e+17	0.847769	0.847769
8.65011e+08	3.7014e+17	3.7014e+17	0.847231	0.847231
8.65994e+08	3.7007e+17	3.7007e+17	0.846692	0.846692
8.67009e+08	3.7e+17	3.7e+17	0.846154	0.846154
8.67992e+08	3.6994e+17	3.6994e+17	0.845692	0.845692
8.69007e+08	3.6982e+17	3.6982e+17	0.844769	0.844769
8.6999e+08	3.6974e+17	3.6974e+17	0.844154	0.844154
8.71005e+08	3.6961e+17	3.6961e+17	0.843154	0.843154
8.71988e+08	3.6955e+17	3.6956e+17	0.842692	0.842769
8.73002e+08	3.6947e+17	3.6948e+17	0.842077	0.842154
8.73985e+08	3.6942e+17	3.6942e+17	0.841692	0.841692
875000000	3.6934e+17	3.6934e+17	0.841077	0.841077
8.76015e+08	3.6926e+17	3.6926e+17	0.840462	0.840462
8.76998e+08	3.6922e+17	3.6922e+17	0.840154	0.840154
8.78012e+08	3.6915e+17	3.6915e+17	0.839615	0.839615
8.78995e+08	3.6909e+17	3.6909e+17	0.839154	0.839154
8.8001e+08	3.69e+17	3.69e+17	0.838462	0.838462
8.80993e+08	3.6894e+17	3.6894e+17	0.838	0.838
8.82008e+08	3.6885e+17	3.6886e+17	0.837308	0.837385
8.82991e+08	3.6876e+17	3.6876e+17	0.836615	0.836615
8.84006e+08	3.6868e+17	3.6868e+17	0.836	0.836
8.84989e+08	3.6862e+17	3.6863e+17	0.835538	0.835615
8.86003e+08	3.6857e+17	3.6857e+17	0.835154	0.835154
8.86986e+08	3.6848e+17	3.6848e+17	0.834462	0.834462
8.88001e+08	3.6839e+17	3.6839e+17	0.833769	0.833769
8.89016e+08	3.6831e+17	3.6831e+17	0.833154	0.833154
8.89999e+08	3.6825e+17	3.6826e+17	0.832692	0.832769
8.91013e+08	3.6818e+17	3.6818e+17	0.832154	0.832154
8.91996e+08	3.6811e+17	3.6812e+17	0.831615	0.831692
8.93011e+08	3.6807e+17	3.6807e+17	0.831308	0.831308
8.93994e+08	3.6802e+17	3.6802e+17	0.830923	0.830923
8.95009e+08	3.6797e+17	3.6797e+17	0.830538	0.830538
8.95992e+08	3.679e+17	3.6791e+17	0.83	0.830077
8.97007e+08	3.6787e+17	3.6787e+17	0.829769	0.829769
8.9799e+08	3.6782e+17	3.6782e+17	0.829385	0.829385
8.99004e+08	3.6779e+17	3.6779e+17	0.829154	0.829154
8.99987e+08	3.6773e+17	3.6773e+17	0.828692	0.828692
9.01002e+08	3.6768e+17	3.6768e+17	0.828308	0.828308
9.01985e+08	3.6764e+17	3.6764e+17	0.828	0.828
9.03e+08	3.6761e+17	3.6761e+17	0.827769	0.827769
9.04014e+08	3.6758e+17	3.6758e+17	0.827538	0.827538
9.04997e+08	3.6755e+17	3.6755e+17	0.827308	0.827308
9.06012e+08	3.675e+17	3.675e+17	0.826923	0.826923
9.06995e+08	3.6748e+17	3.6748e+17	0.826769	0.826769
9.0801e+08	3.6745e+17	3.6745e+17	0.826538	0.826538
9.08993e+08	3.6742e+17	3.6742e+17	0.826308	0.826308
9.10008e+08	3.6737e+17	3.6737e+17	0.825923	0.825923
9.10991e+08	3.6732e+17	3.6732e+17	0.825538	0.825538
9.12005e+08	3.6729e+17	3.6729e+17	0.825308	0.825308
9.12988e+08	3.6723e+17	3.6723e+17	0.824846	0.824846
9.14003e+08	3.6718e+17	3.6718e+17	0.824462	0.824462
9.14986e+08	3.6715e+17	3.6715e+17	0.824231	0.824231
9.16001e+08	3.6711e+17	3.6711e+17	0.823923	0.823923
9.17015e+08	3.6708e+17	3.6708e+17	0.823692	0.823692
9.17998e+08	3.6707e+17	3.6708e+17	0.823615	0.823692
9.19013e+08	3.6704e+17	3.6704e+17	0.823385	0.823385
9.19996e+08	3.6698e+17	3.6698e+17	0.822923	0.822923
9.21011e+08	3.6696e+17	3.6696e+17	0.822769	0.822769
9.21994e+08	3.6692e+17	3.6692e+17	0.822462	0.822462
9.23009e+08	3.6689e+17	3.6689e+17	0.822231	0.822231
9.23992e+08	3.6686e+17	3.6686e+17	0.822	0.822
9.25006e+08	3.6683e+17	3.6683e+17	0.821769	0.821769
9.25989e+08	3.6681e+17	3.6681e+17	0.821615	0.821615
9.27004e+08	3.6679e+17	3.6679e+17	0.821462	0.821462
9.27987e+08	3.6676e+17	3.6676e+17	0.821231	0.821231
9.29002e+08	3.6674e+17	3.6674e+17	0.821077	0.821077
9.29985e+08	3.6673e+17	3.6673e+17	0.821	0.821
9.30999e+08	3.667e+17	3.667e+17	0.820769	0.820769
9.32014e+08	3.6667e+17	3.6667e+17	0.820538	0.820538
9.32997e+08	3.6664e+17	3.6664e+17	0.820308	0.820308
9.34012e+08	3.6662e+17	3.6662e+17	0.820154	0.820154
9.34995e+08	3.6659e+17	3.6659e+17	0.819923	0.819923
9.3601e+08	3.6654e+17	3.6654e+17	0.819538	0.819538
9.36993e+08	3.665e+17	3.665e+17	0.819231	0.819231
9.38007e+08	3.6647e+17	3.6647e+17	0.819	0.819
9.3899e+08	3.6646e+17	3.6646e+17	0.818923	0.818923
9.40005e+08	3.6644e+17	3.6644e+17	0.818769	0.818769
9.40988e+08	3.6641e+17	3.6641e+17	0.818538	0.818538
9.42003e+08	3.6638e+17	3.6638e+17	0.818308	0.818308
9.42986e+08	3.6635e+17	3.6635e+17	0.818077	0.818077
9.44001e+08	3.6632e+17	3.6632e+17	0.817846	0.817846
9.45015e+08	3.663e+17	3.663e+17	0.817692	0.817692
9.45998e+08	3.6626e+17	3.6626e+17	0.817385	0.817385
9.47013e+08	3.6623e+17	3.6623e+17	0.817154	0.817154
9.47996e+08	3.6622e+17	3.6622e+17	0.817077	0.817077
9.49011e+08	3.6618e+17	3.6618e+17	0.816769	0.816769
9.49994e+08	3.6617e+17	3.6617e+17	0.816692	0.816692
9.51008e+08	3.6615e+17	3.6615e+17	0.816538	0.816538
9.51991e+08	3.6613e+17	3.6613e+17	0.816385	0.816385
9.53006e+08	3.6612e+17	3.6612e+17	0.816308	0.816308
9.53989e+08	3.661e+17	3.661e+17	0.816154	0.816154
9.55004e+08	3.6609e+17	3.6609e+17	0.816077	0.816077
9.55987e+08	3.6609e+17	3.6609e+17	0.816077	0.816077
9.57002e+08	3.6606e+17	3.6606e+17	0.815846	0.815846
9.57985e+08	3.6606e+17	3.6606e+17	0.815846	0.815846
9.58999e+08	3.6605e+17	3.6605e+17	0.815769	0.815769
9.60014e+08	3.6604e+17	3.6604e+17	0.815692	0.815692
9.60997e+08	3.6602e+17	3.6602e+17	0.815538	0.815538
9.62012e+08	3.6602e+17	3.6602e+17	0.815538	0.815538
9.62995e+08	3.6601e+17	3.6602e+17	0.815462	0.815538
9.64009e+08	3.6598e+17	3.6599e+17	0.815231	0.815308
9.64992e+08	3.6598e+17	3.6598e+17	0.815231	0.815231
9.66007e+08	3.6596e+17	3.6596e+17	0.815077	0.815077
9.6699e+08	3.6594e+17	3.6594e+17	0.814923	0.814923
9.68005e+08	3.6591e+17	3.6591e+17	0.814692	0.814692
9.68988e+08	3.6588e+17	3.6588e+17	0.814462	0.814462
9.70003e+08	3.6586e+17	3.6586e+17	0.814308	0.814308
9.70986e+08	3.6585e+17	3.6585e+17	0.814231	0.814231
9.72e+08	3.6583e+17	3.6583e+17	0.814077	0.814077
9.73015e+08	3.6582e+17	3.6582e+17	0.814	0.814
9.73998e+08	3.6581e+17	3.6581e+17	0.813923	0.813923
9.75013e+08	3.658e+17	3.658e+17	0.813846	0.813846
9.75996e+08	3.6578e+17	3.6578e+17	0.813692	0.813692
9.7701e+08	3.6577e+17	3.6577e+17	0.813615	0.813615
9.77993e+08	3.6573e+17	3.6573e+17	0.813308	0.813308
9.79008e+08	3.6571e+17	3.6571e+17	0.813154	0.813154
9.79991e+08	3.657e+17	3.657e+17	0.813077	0.813077
9.81006e+08	3.657e+17	3.657e+17	0.813077	0.813077
9.81989e+08	3.6568e+17	3.6568e+17	0.812923	0.812923
9.83004e+08	3.6565e+17	3.6565e+17	0.812692	0.812692
9.83987e+08	3.6565e+17	3.6565e+17	0.812692	0.812692
9.85001e+08	3.6564e+17	3.6564e+17	0.812615	0.812615
9.85984e+08	3.6564e+17	3.6564e+17	0.812615	0.812615
9.86999e+08	3.6564e+17	3.6564e+17	0.812615	0.812615
9.88014e+08	3.6563e+17	3.6563e+17	0.812538	0.812538
9.88997e+08	3.6562e+17	3.6562e+17	0.812462	0.812462
9.90011e+08	3.6562e+17	3.6562e+17	0.812462	0.812462
9.90994e+08	3.656e+17	3.656e+17	0.812308	0.812308
9.92009e+08	3.6558e+17	3.6559e+17	0.812154	0.812231
9.92992e+08	3.6558e+17	3.6558e+17	0.812154	0.812154
9.94007e+08	3.6555e+17	3.6555e+17	0.811923	0.811923
9.9499e+08	3.6555e+17	3.6555e+17	0.811923	0.811923
9.96005e+08	3.6554e+17	3.6554e+17	0.811846	0.811846
9.96988e+08	3.6553e+17	3.6553e+17	0.811769	0.811769
9.98002e+08	3.6552e+17	3.6552e+17	0.811692	0.811692
9.98985e+08	3.655e+17	3.655e+17	0.811538	0.811538
1000000000	3.6546e+17	3.6546e+17	0.811231	0.811231
